treatment, and repeat surgery of proximal humeral fractures in the elderly. *J Bone Joint Surg Am* 2011; 93:121–31

7. Levinsky NG, Yu W, Ash A, Moskowitz M, Gazelle G, Saynina O, Emanuel EJ: Influence of age on Medicare expenditures and medical care in the last year of life. *JAMA* 2001; 286:1349–55
8. Fleisher LA, Beckman JA, Brown KA, Calkins H, Chaikof E, Fleischmann KE, Freeman WK, Froehlich JB, Kasper EK, Kersten JR, Riegel B, Robb JF, Smith SC Jr, Jacobs AK, Adams CD, Anderson JL, Antman EM, Buller CE, Creager MA, Ettinger SM, Faxon DP, Fuster V, Halperin JL, Hiratzka LF, Hunt SA, Lytle BW, Nishimura R, Ornato JP, Page RL, Tarkington LG, Yancy CW: ACC/AHA 2007 guidelines on perioperative cardiovascular evaluation and care for noncardiac surgery: A report of the ACC/AHA Task Force on Practice Guidelines. *Circulation* 2007;116:e418–99
9. Ankuda CK, Block SD, Cooper Z, Correll DJ, Hepner DL, Lasic M, Gawande AA, Bader AM: Measuring quality of decision-making for advance care planning and surgery. *J Surg Res* 2012; 172:189

## ANESTHESIOLOGY REFLECTIONS FROM THE WOOD LIBRARY-MUSEUM

### De la Fuÿe's *L'acupuncture chinoise sans mystère ...*

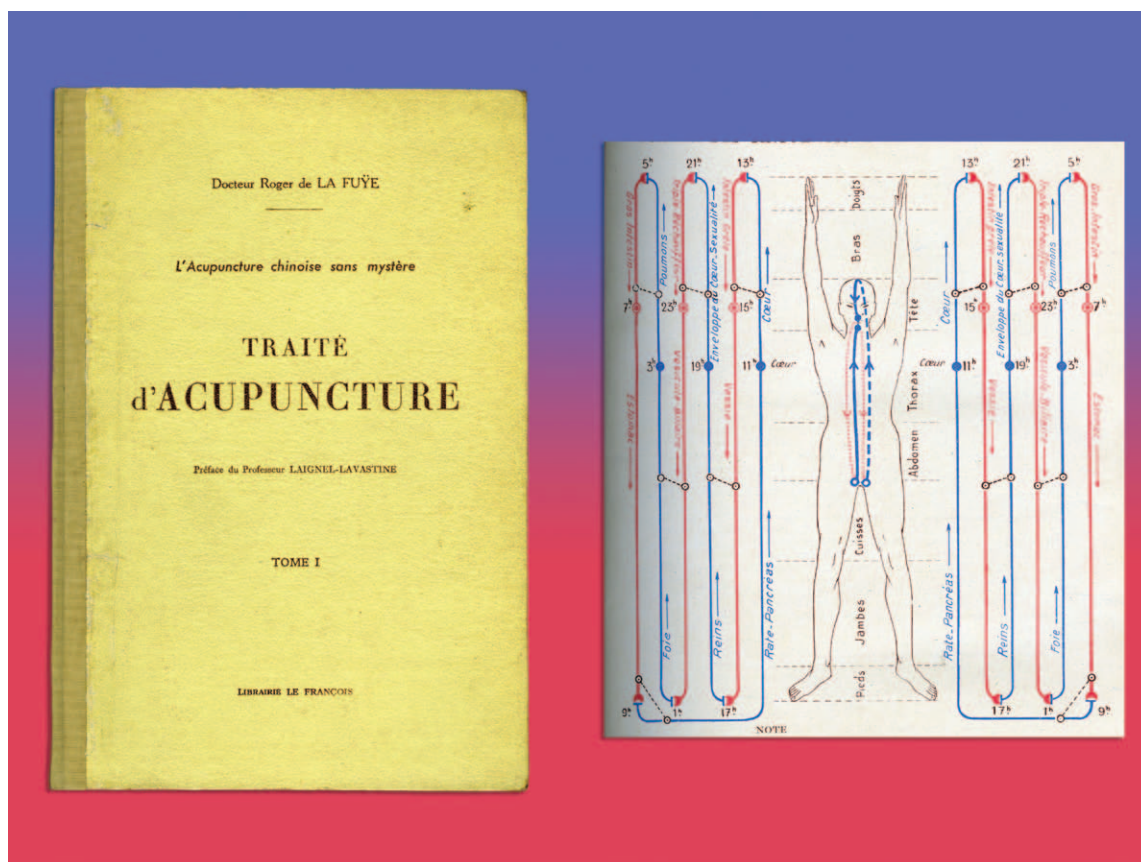

The son of a French army general who had served in Indochina, Dr. Roger de la Fuÿe (1890–1961) founded both the Société française de l'acupuncture (1943) and the Société internationale de l'acupuncture (1946). In 1947 he published the first edition of his text *L'acupuncture chinoise sans mystère; traité d'acupuncture et de l'homéopathie l'homéosiniatrie diathermique*. Beginning at 1 a.m. and linked to each day's successive 2-hour intervals, the 12 classic meridians are depicted (*right*) in that classic by de la Fuÿe as correlated to the liver, lung, large intestine, stomach, spleen, heart, small intestine, bladder, kidney, pericardium, triple heater, and gall bladder, respectively. De la Fuÿe may be best known for laying the foundation for others' claims that acupuncture points are associated with lower electrical resistance—a concept that only some follow-up studies have supported. (Copyright © the American Society of Anesthesiologists, Inc.)

George S. Bause, M.D., M.P.H., Honorary Curator, ASA's Wood Library-Museum of Anesthesiology, Park Ridge, Illinois, and Clinical Associate Professor, Case Western Reserve University, Cleveland, Ohio. UJYC@aol.com.
